# Supplementary material
Source: PubMed Central journal article supplement (PMC7685207)

## **Supplementary Information**

- 1. Supplementary materials and methods**
- 2. Supplementary figure legends**
- 3. Supplementary tables**
- 4. Supplementary figures**

## 1. Materials and methods

### Multiple myeloma cell culture

Mononuclear cells were isolated from fresh BM aspirates by density gradient centrifugation using Ficoll-Paque™ PLUS (GE Healthcare Bio-Sciences AB, Sweden). CD138<sup>+</sup> MM cells were selected by magnetic beads and columns according to the manufacturer's instructions (Miltenyi Biotec, Auburn, CA). All MM cell lines and primary MM cells were cultured in RPMI 1640 medium (Gibco, UK) supplemented with 10% heat-inactivated FBS (Corning, Manassas, VA), 2 mM L-Glutamine (Gibco, Grand Island, NY), 100 units/ml penicillin and 100 µg/ml streptomycin (Gibco, Grand Island, NY).

### Generation of CRISPR modified cells

To generate CD38<sup>KO</sup> and CD16<sup>KO</sup> NK cells, we used crRNA (5-CTGAACTCGCAGTTGGCCAT) targeting the exon 1 of the CD38 gene<sup>33</sup> and crRNA (5-AAAGAGACTTGGTACCCAGG) targeting the exon 5 of CD16A gene. Generating Cas9/RNP complex has been described previously<sup>27, 34</sup>. In brief, pre-transcribed Alt-R® CRISPR-Cas9 crRNAs and Alt-R® CRISPR-Cas9 tracrRNA (Catalog# 1072532) were purchased from IDT (Integrated DNA Technologies, Inc., Coralville, Iowa). Guide RNA (gRNA) was prepared by incubating 200 µM each of crRNA and tracrRNA together in a total volume of 10 µl in Nuclease-Free IDTE, pH 7.5 (1X TE solution, Catalog # 11-01-02-02) at 95 °C for 5 minutes. The Cas9/RNP complex was formed by incubating 2 µl of Alt-R® S.p. HiFi Cas9 Nuclease V3 protein (122 pmol) (Catalog# 1081060), 2 µl of gRNA (400 pmol), and 1 µl of PBS in a total volume of 5 µl for 15-20 minutes at room temperature. Day 7-expanded NK cells were resuspended in 20 µl of P3 Primary Cell 4D-Nucleofector™ X Solution and 5 µl of Cas9/RNP complex and 1 µl of 100µM of Alt-R®

Cas9 Electroporation Enhancer (Catalog# 1075915), and electroporated using Lonza 4D-Nucleofector system with pulse EN-138. Wild type NK (CD38<sup>WT</sup> NK) cells were electroporated without Cas9/RNP complex. After electroporation, the NK cells were rested for 2 days in AIM-V/ICSR growth medium supplemented with 50 IU of rIL-2 before assessing the efficiency of CRISPR modification using flow cytometry. The cells were then expanded with CSTX002. Residual CD38<sup>+</sup> NK cells were removed by labeling with biotinylated anti-CD38 antibody (BioLegend) followed by anti-biotin microbeads (Miltenyi Biotec, Auburn, CA) and depletion on an LD column (Miltenyi Biotec, Auburn, CA).

### **Identifying off-target effects of CD38-targeted Cas9/RNP**

Whole genome sequencing was used to identify the off-target effects of Cas9/RNP targeted to CD38. Genomic DNA (gDNA) was isolated from CD38<sup>WT</sup> and CD38<sup>KO</sup> NK cells using DNeasy Blood and Tissue Kit (Qiagen, Cat No./ID: 69504). DNA libraries were constructed using NEBNext Ultra II-FS DNA Library Prep Kit (New England Biolabs, Ipswich MA). Samples were enzymatically fragmented, 5' phosphorylated, dA-Tailed, and ligated with a unique, dual indexed adapter approach to prevent sample mis-assignment and resolve index hopping (Integrated DNA Technologies, Iowa). The adaptor-ligated DNA was amplified by limit-cycle PCR and purified using a magnetic-bead based approach. Library quality was analyzed on TapeStation High-Sensitivity D1000 ScreenTape (Agilent Biotechnologies) and quantified by KAPA qPCR (KAPA BioSystems). Libraries were sequenced at 2 x 150 bp read lengths to a depth of ~30X coverage on the Illumina HiSeq4000 platform.

### **Conjugation assay**

Each NK cells were stained with 5  $\mu$ M of green dye CFDA SE (CFSE) cell tracer (Invitrogen, Eugene, Oregon) for 15 minutes at 37°C or 5  $\mu$ M red dye PKH26 (Sigma-Aldrich, St. Louis, MO) for 5 minutes at room temperature. Staining was stopped by adding complete medium to the cell suspension. The cells were washed twice with complete medium. The green and red labeled NK cells were mixed at the ratio of 1:1 in 200  $\mu$ l of total volume supplemented with 10  $\mu$ g/ml of DARA or solvent control (saline) and co-cultured at 37°C in a 5% CO<sub>2</sub> incubator for 4 hours. Then the cells were gently collected and fixed with 200  $\mu$ l of 4% formaldehyde and 20,000 cells were analyzed for conjugation using flow cytometry.

### **Flow-based killing assay**

To assess DARA-mediated ADCC, MM cell lines or purified primary CD138<sup>+</sup> MM cells were labeled with 5  $\mu$ M of CFSE and co-cultured with CD38<sup>WT</sup> or CD38<sup>KO</sup> NK cells at the indicated effector-to-target (E:T) ratios in flat bottom 96-well plates (Falcon, USA) in the presence of 10  $\mu$ g/ml of DARA or solvent as control. Due to low frequency of DARA-resistant primary samples (CD38<sup>negative/low</sup>), we did not purify these cells and MM cells were defined as CD138<sup>+</sup>CD45<sup>-</sup> cells. The viability of target cells was analyzed after 4 hours for MM cell lines, and 24 hours for primary samples. In some experiments, myeloma cell lines were pretreated with 50 nM of ATRA for 2 days prior to 4-hour cytotoxicity assay. To study the effect of ATRA on overall DARA-mediated NK cell cytotoxicity, MM cells and NK cells were co-cultured for 48 hours in the presence of DARA and 50 nM of ATRA. Viable target cells were assessed from the percent or absolute number of 7-AAD negative/CFSE positive cells among total CFSE positive cells or using beads. Background was determined from the target cells incubated in the absence of effector cells and DARA. The percentage of DARA-mediated ADCC (%) was calculated according

to the formula: (1- the percent or absolute number of viable target cells in the presence of effector cells with DARA / that of the corresponding sample with solvent control) × 100.

All assays were performed in triplicate with 2 or 3 independent donors.

### **RNA sequencing and Ingenuity Pathway Analysis**

Strand-specific RNA-seq libraries were prepared using NEBNext Ultra II Directional RNA Library Prep Kit, following the manufacturer's recommendations (New England Biolabs, Ipswich MA). In summary, total RNA isolated from same donors (n = 6) CD38<sup>WT</sup> and CD38<sup>KO</sup> NK cells, (total of 12 samples) quality was assessed using RNA 6000 Nano kit on Agilent 2100 Bioanalyzer (Agilent Biotechnologies) and concentration measured using Qubit RNA HS assay kit (Life Technologies). A 40-500 ng aliquot of total RNA was rRNA depleted using NEB's Human/Mouse/Rat RNase-H based Depletion kit (New England BioLabs). Following rRNA removal, mRNA was fragmented and then used for first- and second-strand cDNA synthesis with random hexamer primers. Double stranded cDNA fragments underwent end-repair and a-tailing and ligation of dual-unique adapters (Integrated DNA Technologies). Adaptor-ligated cDNA was amplified by limit-cycle PCR and purified using a magnetic-bead based approach. Library quality was analyzed on TapeStation High-Sensitivity D1000 ScreenTape (Agilent Biotechnologies) and quantified by KAPA qPCR (KAPA BioSystems). Libraries were pooled and sequenced at 2 x 150 bp read lengths on the Illumina HiSeq 4000 platform to generate approximately 60-80 million paired-end reads per sample. We next used the normalized RNA-seq data and filtered before input to Ingenuity Pathway Analysis (IPA) by eliminating genes that were not expressed at greater than or equal to 10 FPM in at least one sample. Differentially-expressed genes (DEGs) were identified as those in which a paired two-

sided t-test of gene expression levels between CD38<sup>WT</sup> and CD38<sup>KO</sup> NK cells yielded a p-value of less than 0.05. Adjusting the p-value cutoff for DEGs to 0.01 or 0.1, or adjusting the minimum gene expression cutoff to 5 FPM, does not qualitatively affect conclusions. The mean fold changes of each gene across CD38<sup>WT</sup> and CD38<sup>KO</sup> NK cells are approximately equal to the fold changes of the means in the reported pathways, so inter-individual effects (CD38<sup>WT</sup> and CD38<sup>KO</sup> NK cells from the same donors) can be considered negligible for these conclusions. All default settings for a core analysis in IPA were implemented. We were not able to study the transcriptomic profile of CD38<sup>WT</sup> and CD38<sup>KO</sup> NK cells in presence of DARA, as the CD38<sup>WT</sup> NK cells are killed by DARA-induced fratricide.

## 2. Supplementary figure legends

### **Figure S1. Immunophenotype of ex vivo expanded NK cells.**

(A) The purity of NK cells 14 days after stimulation is shown. (B) Representative FACS analyses of CD16 expression on CD38<sup>WT</sup> and CD38<sup>KO</sup> NK cells of the same donor are shown. Each figure indicates the percentage of CD16 expressing NK cells. Isotype controls are depicted with filled histogram.

### **Figure S2. Expression of genes affected by Cas9/RNP.**

Relative mRNA expression by RNA-seq of highly-affected genes from Table S3.

### **Figure S3. Biological features of CD16<sup>KO</sup> NK cells.**

(A) FACS analyses of CD16<sup>WT</sup> and CD16<sup>KO</sup> NK cells. (B) The viability of each CD16<sup>WT</sup> and CD16<sup>KO</sup> NK cells treated with DARA (10µg/ml) for 4 or 24 hours compared to that of control samples is shown. CD16<sup>KO</sup> NK cells show no evidence of fratricide. C-D) H929 cell line was incubated with CD16<sup>WT</sup> or CD16<sup>KO</sup> NK cells in the presence or absence of DARA (10µg/ml) for 4 hours. The viability compared to control sample and ADCC activity of paired CD16<sup>WT</sup> and CD16<sup>KO</sup> NK cells are shown.

### **Figure S4. Dependence of DARA-mediated lysis of MM cells on effector NK cells.**

Each MM cell line was incubated with DARA (10µg/ml) with or without CD38<sup>KO</sup> NK effector cells (E/T = 5) for 4 hours. The viability compared to each control sample are shown. The experiment was performed in the presence of heat inactivated serum and thus in the absence of complement.

**Figure S5. CD38 expression of MM cells from a relapsed case during DARA treatment.** BM mononuclear cells from a DARA-resistant patient and healthy donor-derived CD38<sup>WT</sup> and CD38<sup>KO</sup> NK cells were stained with multi-epitope anti-CD38 antibodies. MM cells were defined by expression of CD138. MFI (CD38) of stained samples and fluorescence minus one (FMO) (without multi-epitope anti-CD38 antibodies) controls are shown.

**Figure S6. Relative advantage of CD38<sup>KO</sup> NK cells compared to CD38<sup>WT</sup> NK cells as effectors for DARA-ADCC compared to expression level of CD38 on the MM cell targets.**

X axis indicates the relative ratio of MFI (CD38) of target cells to CD38<sup>WT</sup> NK cells. Y axis indicates the relative increase in ADCC of CD38<sup>KO</sup> NK cells compared to that of CD38<sup>WT</sup> NK cells. The values of ADCC (E/T = 5, in 4 hour-assay) are used for MM.1S, H929, and OPM-2, and those (E/T = 0.1, in 24 hour-assay) are used for RPMI 8226 and patient samples. Spearman's rank-correlation coefficients ( $r$ ) and  $p$  value are presented.

**Figure S7. CD38 expression on MM cell lines 48 hours after incubation with ATRA.** Control and ATRA treated samples are shown with black and gray line respectively. Unstained controls are depicted with filled histogram.

**Figure S8. Volcano plot of normalized RNA-seq data of 6 different pairs of CD38<sup>WT</sup> and CD38<sup>KO</sup> NK cells.**



The most significantly changed genes in CD38<sup>KO</sup> NK cells compared to CD38<sup>WT</sup> NK cells are shown.

### **3. Supplementary tables**

**Table S1. Character of clinical samples.**

|                        | Age | Subtype                   | Frequency of plasma cells | ISS | Chromosomes                                                      | Treatment history                                                           | Last DARA infusion |
|------------------------|-----|---------------------------|---------------------------|-----|------------------------------------------------------------------|-----------------------------------------------------------------------------|--------------------|
| Patient-1              | 75  | IgG lambda myeloma        | 50%                       | NA  | nuc ish(D3Z1,CCND1-XT)x3<br>(D9Z1,D15Z4)x3-4                     | naïve                                                                       | none               |
| Patient-2              | 67  | IgG lambda myeloma        | 70-80%                    | 1   | t(11;14) and 11q-                                                | PI, IMiD, autologous SCT, DARA<br>XPO1 inhibitor, BCL2 inhibitor, anti-BCMA | 22 months before   |
| Patient-3              | 47  | IgG kappa<br>plasmaeytoma | <5%                       | 1   | unknown                                                          | naïve                                                                       | none               |
| Patient-4              | 73  | IgA lambda myeloma        | 10-15%                    | 1   | 1q+, 1p-, 6+, 9+, 15+<br>IgH translocation without usual partner | naïve                                                                       | none               |
| Patient-5              | 57  | IgA kappa myeloma         | 40-50%                    | 3   | 1q+, t(4;14), -13 myc disruption                                 | naïve                                                                       | none               |
| DARA-resistant patient | 42  | IgG lambda myeloma        | <1%                       | 3   | +1q, monosomy 13, del 14                                         | PI, autologous SCT, IMiD, DARA                                              | 10 days before     |

NA indicates not applicable. \*Frequency of plasma cells are assessed in biopsy samples.

**Table S2. Antibodies list.**

| <i>Brand</i>         | <i>Reactivity</i> | <i>Name</i>  | <i>Clone</i>         | <i>Format</i>          |
|----------------------|-------------------|--------------|----------------------|------------------------|
| <i>BD</i>            | <i>Human</i>      | <i>CD3</i>   | <i>SK7</i>           | <i>FITC</i>            |
| <i>BD Pharmingen</i> | <i>Human</i>      | <i>CD16</i>  | <i>3G8</i>           | <i>PE</i>              |
| <i>BD Pharmingen</i> | <i>Human</i>      | <i>CD16</i>  | <i>3G8</i>           | <i>Alexa Fluor 647</i> |
| <i>BD Pharmingen</i> | <i>Human</i>      | <i>CD19</i>  | <i>SJ25C1</i>        | <i>APC-Cy7</i>         |
| <i>BD Horizon</i>    | <i>Human</i>      | <i>CD33</i>  | <i>WM53</i>          | <i>BV421</i>           |
| <i>BD</i>            | <i>Human</i>      | <i>CD38</i>  | <i>HB7</i>           | <i>PE</i>              |
| <i>Biolegend</i>     | <i>Human</i>      | <i>CD38</i>  | <i>HB7</i>           | <i>APC</i>             |
| <i>Biolegend</i>     | <i>Human</i>      | <i>CD38</i>  | <i>HIT2</i>          | <i>Biotin</i>          |
| <i>Cytognos</i>      | <i>Human</i>      | <i>CD38</i>  | <i>Multi-epitope</i> | <i>FITC</i>            |
| <i>BD Pharmingen</i> | <i>Human</i>      | <i>CD56</i>  | <i>B159</i>          | <i>Alexa Fluor 647</i> |
| <i>BD Pharmingen</i> | <i>Human</i>      | <i>CD138</i> | <i>MI15</i>          | <i>PE</i>              |
| <i>BD Pharmingen</i> | <i>Human</i>      | <i>CD45</i>  | <i>HI30</i>          | <i>APC</i>             |
| <i>BD Horizon</i>    | <i>Human</i>      | <i>CD45</i>  | <i>HI30</i>          | <i>BV421</i>           |
| <i>BD Pharmingen</i> | <i>Mouse</i>      | <i>CD45</i>  | <i>30-F11</i>        | <i>FITC</i>            |
| <i>Biolegend</i>     | <i>Mouse</i>      | <i>FITC</i>  | <i>FIT-22</i>        | <i>APC</i>             |

Supplementary Table S3.

| Gene     | Chr | position  | Variant Allele frequency in CD38 <sup>KO</sup> NK | Variant Allele frequency in CD38 <sup>WT</sup> NK | Ref                                    | Alt                                           | Filter                                 | Loc In Gene     | Effect                           | Impact   |
|----------|-----|-----------|---------------------------------------------------|---------------------------------------------------|----------------------------------------|-----------------------------------------------|----------------------------------------|-----------------|----------------------------------|----------|
| ANKRD36C | 2   | 96517484  | 6.90%                                             | 0.00%                                             | T                                      | G                                             | clustered_events,t_lod,mapping_quality | coding_sequence | nonsynonymous SNV                | MODERATE |
| APOBEC3H | 22  | 39497425  | 19.05%                                            | 0.00%                                             | T                                      | A                                             | PASS                                   | coding_sequence | nonsynonymous SNV                | MODERATE |
| CC2D1B   | 1   | 52825875  | 8.00%                                             | 0.00%                                             | T                                      | TC                                            | clustered_events,t_lod                 | coding_sequence | frameshift                       | HIGH     |
| CC2D1B   | 1   | 52825879  | 7.69%                                             | 0.00%                                             | C                                      | CAG                                           | clustered_events,t_lod                 | coding_sequence | frameshift                       | HIGH     |
| CC2D1B   | 1   | 52825881  | 7.69%                                             | 0.00%                                             | C                                      | CCTTGGA<br>GTCGCAG<br>CTAGCCT<br>CTGTGAG<br>G | clustered_events,t_lod                 | coding_sequence | frameshift&stopgain              | HIGH     |
| CCDC181  | 1   | 169388367 | 19.05%                                            | 0.00%                                             | C                                      | T                                             | clustered_events                       | coding_sequence | nonsynonymous SNV                | MODERATE |
| CCDC181  | 1   | 169388373 | 18.18%                                            | 0.00%                                             | C                                      | T                                             | clustered_events,base_quality          | coding_sequence | nonsynonymous SNV                | MODERATE |
| CD38     | 4   | 15780022  | 12.00%                                            | 0.00%                                             | CC<br>CC<br>GC<br>CT<br>GG<br>AG<br>CC | C                                             | clustered_events                       | coding_sequence | startloss&nonframeshift deletion | HIGH     |

|             |   |               |        |       |                                                                                                                           |        |                            |                     |                      |      |
|-------------|---|---------------|--------|-------|---------------------------------------------------------------------------------------------------------------------------|--------|----------------------------|---------------------|----------------------|------|
|             |   |               |        |       | CT<br>AT<br>GG<br>CC<br>AA<br>CT<br>GC<br>GA<br>GT<br>TC<br>AG<br>CC<br>CG<br>GT<br>GT<br>CC<br>GG<br>GG<br>AC<br>AA<br>A |        |                            |                     |                      |      |
| <b>CD38</b> | 4 | 15780<br>032  | 31.25% | 0.00% | AG<br>CC<br>CT<br>AT<br>G                                                                                                 | A      | clustered_events           | coding_se<br>quence | frameshift&startloss | HIGH |
| <b>CD38</b> | 4 | 15780<br>039  | 13.33% | 0.00% | TG                                                                                                                        | T      | clustered_events<br>,t_lod | coding_se<br>quence | frameshift           | HIGH |
| <b>CD38</b> | 4 | 15780<br>040  | 12.50% | 0.00% | GG<br>CC<br>AA                                                                                                            | G      | clustered_events           | coding_se<br>quence | frameshift           | HIGH |
| <b>CR1</b>  | 1 | 20778<br>2852 | 8.00%  | 0.00% | T                                                                                                                         | TTCTGG | clustered_events<br>,t_lod | coding_se<br>quence | frameshift           | HIGH |

|                |    |               |        |       |                            |                                    |                                                     |                     |                                      |          |
|----------------|----|---------------|--------|-------|----------------------------|------------------------------------|-----------------------------------------------------|---------------------|--------------------------------------|----------|
| <b>CR1</b>     | 1  | 20778<br>2853 | 8.00%  | 0.00% | A                          | AGCTGTG<br>C                       | clustered_events<br>,t_lod                          | coding_se<br>quence | frameshift                           | HIGH     |
| <b>CR1</b>     | 1  | 20778<br>2855 | 8.33%  | 0.00% | T                          | TTTATTAG<br>TAG                    | clustered_events<br>,t_lod                          | coding_se<br>quence | frameshift                           | HIGH     |
| <b>CR1</b>     | 1  | 20778<br>2860 | 7.69%  | 0.00% | G                          | A                                  | clustered_events<br>,t_lod                          | coding_se<br>quence | nonsynonymous<br>SNV                 | MODERATE |
| <b>DENND4B</b> | 1  | 15390<br>3191 | 8.70%  | 0.00% | TG                         | T                                  | clustered_events<br>,t_lod                          | coding_se<br>quence | frameshift                           | HIGH     |
| <b>DENND4B</b> | 1  | 15390<br>3197 | 8.33%  | 0.00% | CC<br>CT<br>AG<br>AG<br>TT | C                                  | clustered_events<br>,t_lod                          | coding_se<br>quence | nonframeshift<br>deletion            | MODERATE |
| <b>DENND4B</b> | 1  | 15390<br>3210 | 10.53% | 0.00% | A                          | T                                  | clustered_events<br>,base_quality,rea<br>d_position | coding_se<br>quence | nonsynonymous<br>SNV                 | MODERATE |
| <b>DENND4B</b> | 1  | 15390<br>3213 | 9.52%  | 0.00% | A                          | T                                  | clustered_events<br>,base_quality,rea<br>d_position | coding_se<br>quence | nonsynonymous<br>SNV                 | MODERATE |
| <b>DENND4B</b> | 1  | 15390<br>3216 | 11.11% | 0.00% | A                          | AAACTCT<br>AGG                     | clustered_events<br>,base_quality,rea<br>d_position | coding_se<br>quence | stopgain&nonframes<br>hift insertion | HIGH     |
| <b>FGF7</b>    | 15 | 49776<br>539  | 12.50% | 0.00% | A                          | T                                  | PASS                                                | coding_se<br>quence | nonsynonymous<br>SNV                 | MODERATE |
| <b>FGFR2</b>   | 10 | 12324<br>4918 | 10.53% | 0.00% | G                          | GGGCAC<br>CGGCAG<br>GAAAGAC<br>AAC | PASS                                                | coding_se<br>quence | nonframeshift<br>insertion           | MODERATE |
| <b>FGFR2</b>   | 10 | 12324<br>4922 | 10.53% | 0.00% | A                          | ACCAACG<br>AACTGTA<br>AGGGCT       | PASS                                                | coding_se<br>quence | frameshift                           | HIGH     |
| <b>FHOD1</b>   | 16 | 67270<br>885  | 10.53% | 0.00% | G                          | A                                  | PASS                                                | coding_se<br>quence | nonsynonymous<br>SNV                 | MODERATE |

|                |        |               |        |       |   |                |                                                           |                     |                            |          |
|----------------|--------|---------------|--------|-------|---|----------------|-----------------------------------------------------------|---------------------|----------------------------|----------|
| <b>FOXP3</b>   | X      | 49107<br>814  | 9.09%  | 0.00% | T | A              | PASS                                                      | coding_se<br>quence | nonsynonymous<br>SNV       | MODERATE |
| <b>KMT2C</b>   | 7      | 15196<br>2134 | 9.76%  | 0.00% | G | T              | PASS                                                      | coding_se<br>quence | stopgain                   | HIGH     |
| <b>MT-ATP6</b> | M<br>T | 9181          | 1.33%  | 0.00% | A | G              | PASS                                                      | coding_se<br>quence | nonsynonymous<br>SNV       | MODERATE |
| <b>MYH4</b>    | 17     | 10352<br>331  | 10.00% | 0.00% | T | G              | clustered_events                                          | coding_se<br>quence | nonsynonymous<br>SNV       | MODERATE |
| <b>MYH4</b>    | 17     | 10352<br>336  | 8.70%  | 0.00% | C | CAGG           | clustered_events<br>,t_lod,read_positi<br>on              | coding_se<br>quence | nonframeshift<br>insertion | MODERATE |
| <b>MYH4</b>    | 17     | 10352<br>338  | 8.70%  | 0.00% | T | TGCAGAA<br>GAA | clustered_events<br>,t_lod,read_positi<br>on              | coding_se<br>quence | nonframeshift<br>insertion | MODERATE |
| <b>MYH4</b>    | 17     | 10352<br>340  | 9.09%  | 0.00% | C | A              | clustered_events<br>,base_quality,t_lo<br>d,read_position | coding_se<br>quence | nonsynonymous<br>SNV       | MODERATE |
| <b>NBPF14</b>  | 1      | 14825<br>2777 | 15.38% | 0.00% | T | TCTC           | PASS                                                      | coding_se<br>quence | nonframeshift<br>insertion | MODERATE |
| <b>OR2T4</b>   | 1      | 24852<br>5100 | 12.50% | 0.00% | G | A              | clustered_events                                          | coding_se<br>quence | nonsynonymous<br>SNV       | MODERATE |
| <b>OR2T4</b>   | 1      | 24852<br>5135 | 11.11% | 0.00% | G | A              | clustered_events                                          | coding_se<br>quence | nonsynonymous<br>SNV       | MODERATE |
| <b>OR2T4</b>   | 1      | 24852<br>5138 | 13.79% | 0.00% | C | T              | clustered_events                                          | coding_se<br>quence | nonsynonymous<br>SNV       | MODERATE |
| <b>PABPC1</b>  | 8      | 10171<br>8932 | 7.41%  | 0.00% | C | G              | clustered_events<br>,t_lod                                | coding_se<br>quence | nonsynonymous<br>SNV       | MODERATE |
| <b>PABPC1</b>  | 8      | 10171<br>8968 | 7.14%  | 0.00% | C | T              | clustered_events<br>,t_lod                                | coding_se<br>quence | nonsynonymous<br>SNV       | MODERATE |
| <b>PABPC1</b>  | 8      | 10172<br>1705 | 8.33%  | 0.00% | G | T              | clustered_events<br>,t_lod                                | coding_se<br>quence | nonsynonymous<br>SNV       | MODERATE |
| <b>PABPC1</b>  | 8      | 10172<br>1709 | 8.33%  | 0.00% | T | A              | clustered_events<br>,t_lod                                | coding_se<br>quence | nonsynonymous<br>SNV       | MODERATE |

|               |    |               |        |       |    |                                    |                            |                     |                            |          |
|---------------|----|---------------|--------|-------|----|------------------------------------|----------------------------|---------------------|----------------------------|----------|
| <b>PABPC1</b> | 8  | 10172<br>1812 | 11.54% | 0.00% | G  | A                                  | clustered_events           | coding_se<br>quence | nonsynonymous<br>SNV       | MODERATE |
| <b>PABPC1</b> | 8  | 10172<br>1817 | 10.71% | 0.00% | T  | C                                  | clustered_events           | coding_se<br>quence | nonsynonymous<br>SNV       | MODERATE |
| <b>PABPC1</b> | 8  | 10172<br>1839 | 10.34% | 0.00% | C  | A                                  | clustered_events<br>,t_lod | coding_se<br>quence | nonsynonymous<br>SNV       | MODERATE |
| <b>FGFR2</b>  | 10 | 12324<br>4918 | 10.53% | 0.00% | G  | GGGCAC<br>CGGCAG<br>GAAAGAC<br>AAC | PASS                       | coding_se<br>quence | nonframeshift<br>insertion | MODERATE |
| <b>FGFR2</b>  | 10 | 12324<br>4922 | 10.53% | 0.00% | A  | ACCAACG<br>AACTGTA<br>AGGGCT       | PASS                       | coding_se<br>quence | frameshift                 | HIGH     |
| <b>PABPC3</b> | 13 | 25670<br>851  | 9.38%  | 0.00% | A  | G                                  | PASS                       | coding_se<br>quence | nonsynonymous<br>SNV       | MODERATE |
| <b>PABPC3</b> | 13 | 25671<br>545  | 6.67%  | 0.00% | C  | A                                  | clustered_events<br>,t_lod | coding_se<br>quence | nonsynonymous<br>SNV       | MODERATE |
| <b>PABPC3</b> | 13 | 25671<br>549  | 9.38%  | 0.00% | A  | G                                  | clustered_events           | coding_se<br>quence | nonsynonymous<br>SNV       | MODERATE |
| <b>PABPC3</b> | 13 | 25671<br>555  | 9.68%  | 0.00% | G  | A                                  | clustered_events           | coding_se<br>quence | nonsynonymous<br>SNV       | MODERATE |
| <b>PABPC3</b> | 13 | 25671<br>558  | 9.38%  | 0.00% | C  | T                                  | clustered_events           | coding_se<br>quence | nonsynonymous<br>SNV       | MODERATE |
| <b>PABPC3</b> | 13 | 25671<br>564  | 10.34% | 0.00% | A  | T                                  | clustered_events           | coding_se<br>quence | nonsynonymous<br>SNV       | MODERATE |
| <b>PABPC3</b> | 13 | 25671<br>573  | 15.63% | 0.00% | CA | TG                                 | clustered_events           | coding_se<br>quence | nonsynonymous<br>SNV       | MODERATE |
| <b>PABPC3</b> | 13 | 25671<br>585  | 18.75% | 0.00% | TA | CC                                 | clustered_events           | coding_se<br>quence | nonsynonymous<br>SNV       | MODERATE |
| <b>PABPC3</b> | 13 | 25671<br>699  | 12.50% | 0.00% | GT | CC                                 | clustered_events           | coding_se<br>quence | nonsynonymous<br>SNV       | MODERATE |
| <b>PABPC3</b> | 13 | 25671<br>742  | 7.14%  | 0.00% | G  | A                                  | clustered_events<br>,t_lod | coding_se<br>quence | nonsynonymous<br>SNV       | MODERATE |



|                 |    |              |        |       |    |                |                                                           |                     |                            |          |
|-----------------|----|--------------|--------|-------|----|----------------|-----------------------------------------------------------|---------------------|----------------------------|----------|
| <b>PABPC3</b>   | 13 | 25671<br>759 | 7.14%  | 0.00% | C  | T              | clustered_events<br>,t_lod                                | coding_se<br>quence | nonsynonymous<br>SNV       | MODERATE |
| <b>WDR89</b>    | 14 | 64066<br>367 | 10.00% | 0.00% | A  | T              | clustered_events<br>,t_lod                                | coding_se<br>quence | nonsynonymous<br>SNV       | MODERATE |
| <b>WDR89</b>    | 14 | 64066<br>453 | 14.29% | 0.00% | G  | A              | clustered_events                                          | coding_se<br>quence | nonsynonymous<br>SNV       | MODERATE |
| <b>WDR89</b>    | 14 | 64066<br>471 | 12.00% | 0.00% | GT | AG             | clustered_events<br>,mapping_quality                      | coding_se<br>quence | stopgain                   | HIGH     |
| <b>FGF7</b>     | 15 | 49776<br>539 | 12.50% | 0.00% | A  | T              | PASS                                                      | coding_se<br>quence | nonsynonymous<br>SNV       | MODERATE |
| <b>FHOD1</b>    | 16 | 67270<br>885 | 10.53% | 0.00% | G  | A              | PASS                                                      | coding_se<br>quence | nonsynonymous<br>SNV       | MODERATE |
| <b>MYH4</b>     | 17 | 10352<br>331 | 10.00% | 0.00% | T  | G              | clustered_events                                          | coding_se<br>quence | nonsynonymous<br>SNV       | MODERATE |
| <b>MYH4</b>     | 17 | 10352<br>336 | 8.70%  | 0.00% | C  | CAGG           | clustered_events<br>,t_lod,read_positi<br>on              | coding_se<br>quence | nonframeshift<br>insertion | MODERATE |
| <b>MYH4</b>     | 17 | 10352<br>338 | 8.70%  | 0.00% | T  | TGCAGAA<br>GAA | clustered_events<br>,t_lod,read_positi<br>on              | coding_se<br>quence | nonframeshift<br>insertion | MODERATE |
| <b>MYH4</b>     | 17 | 10352<br>340 | 9.09%  | 0.00% | C  | A              | clustered_events<br>,base_quality,t_lo<br>d,read_position | coding_se<br>quence | nonsynonymous<br>SNV       | MODERATE |
| <b>STXBP4</b>   | 17 | 53237<br>239 | 12.50% | 0.00% | T  | G              | clustered_events<br>,mapping_quality                      | coding_se<br>quence | nonsynonymous<br>SNV       | MODERATE |
| <b>STXBP4</b>   | 17 | 53237<br>241 | 12.50% | 0.00% | G  | T              | clustered_events<br>,mapping_quality                      | coding_se<br>quence | nonsynonymous<br>SNV       | MODERATE |
| <b>STXBP4</b>   | 17 | 53237<br>250 | 13.04% | 0.00% | A  | C              | clustered_events<br>,mapping_quality                      | coding_se<br>quence | nonsynonymous<br>SNV       | MODERATE |
| <b>SIGLEC10</b> | 19 | 51919<br>263 | 11.11% | 0.00% | G  | T              | clustered_events<br>,mapping_quality                      | coding_se<br>quence | nonsynonymous<br>SNV       | MODERATE |
| <b>SIGLEC10</b> | 19 | 51919<br>279 | 12.50% | 0.00% | A  | G              | clustered_events<br>,mapping_quality                      | coding_se<br>quence | startloss                  | LOW      |

|                 |        |              |        |       |   |   |                                      |                     |                      |          |
|-----------------|--------|--------------|--------|-------|---|---|--------------------------------------|---------------------|----------------------|----------|
| <b>SIGLEC10</b> | 19     | 51919<br>302 | 9.52%  | 0.00% | T | C | clustered_events<br>,mapping_quality | coding_se<br>quence | nonsynonymous<br>SNV | MODERATE |
| <b>APOBEC3H</b> | 22     | 39497<br>425 | 19.05% | 0.00% | T | A | PASS                                 | coding_se<br>quence | nonsynonymous<br>SNV | MODERATE |
| <b>FOXP3</b>    | X      | 49107<br>814 | 9.09%  | 0.00% | T | A | PASS                                 | coding_se<br>quence | nonsynonymous<br>SNV | MODERATE |
| <b>MT-ATP6</b>  | M<br>T | 9181         | 1.33%  | 0.00% | A | G | PASS                                 | coding_se<br>quence | nonsynonymous<br>SNV | MODERATE |

Figure S1.

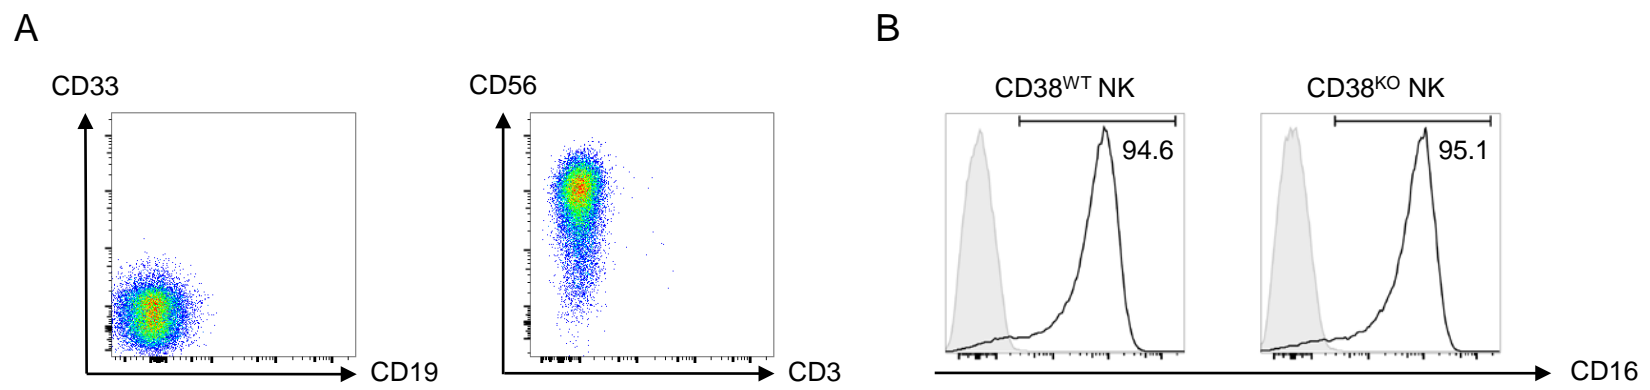

Figure S2.

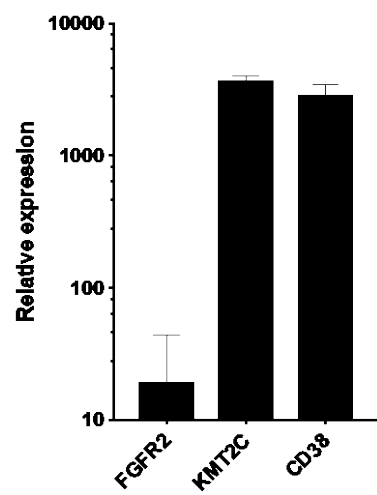

Figure S3.

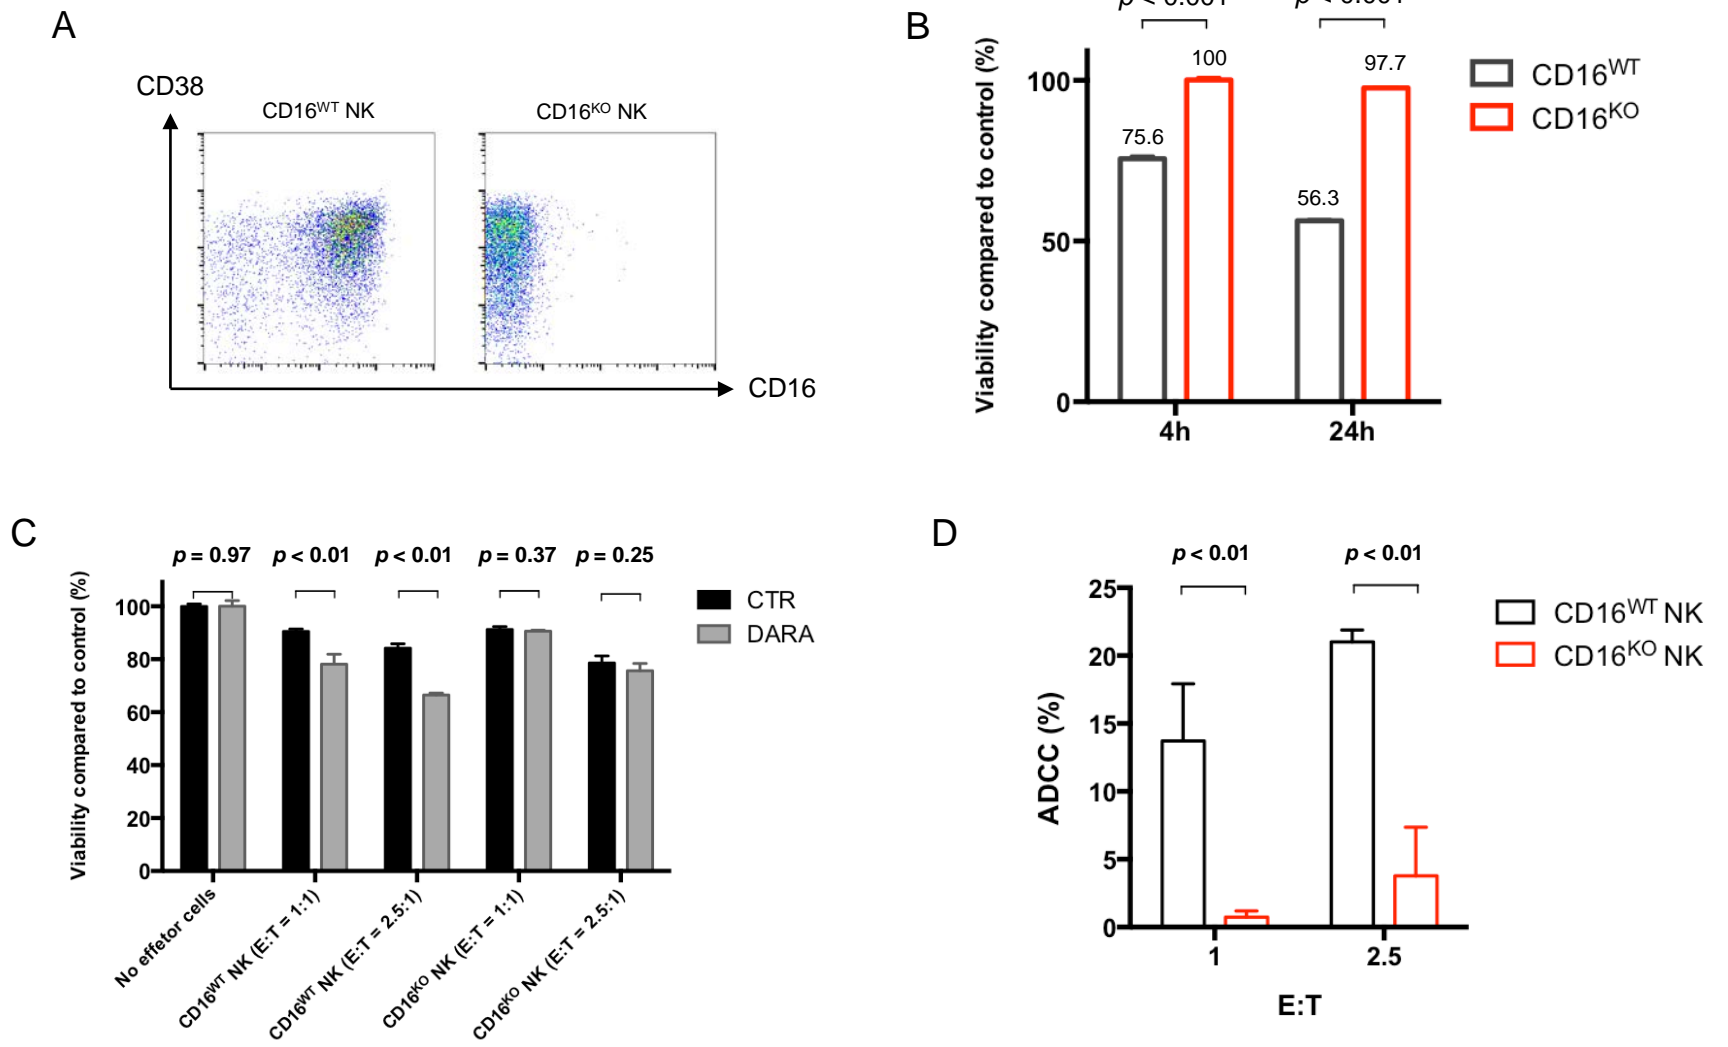

Figure S4.

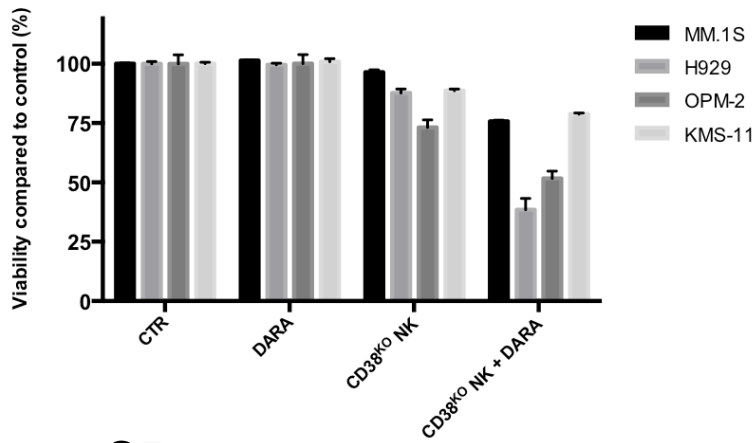

Figure S5.

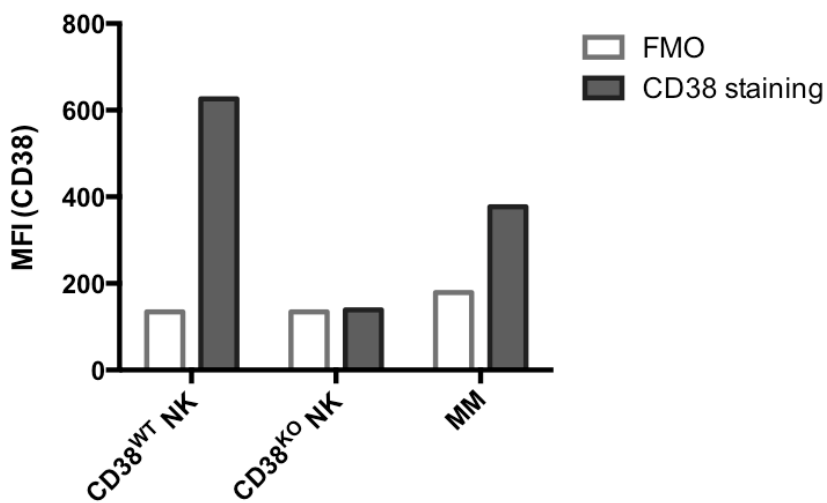

Figure S6.

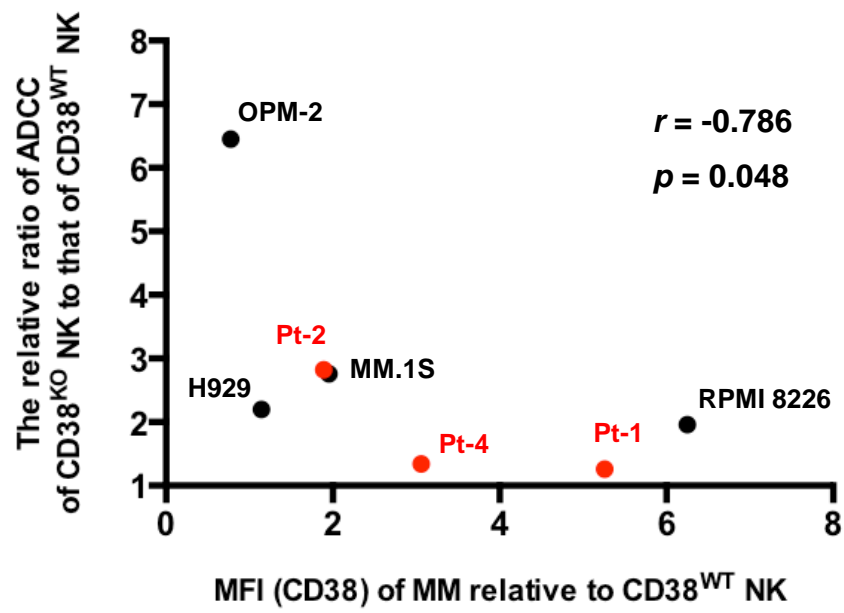

Figure S7.

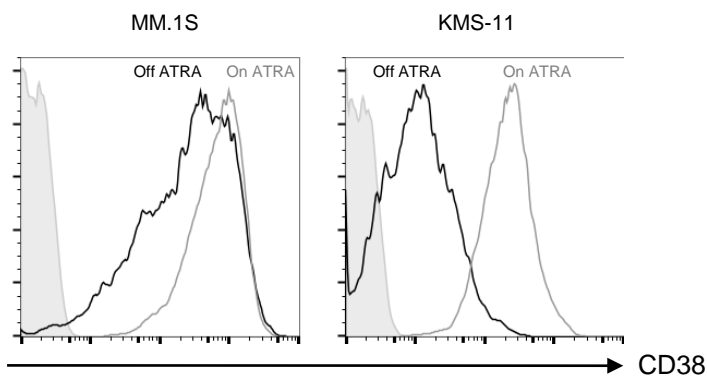

Figure S8.

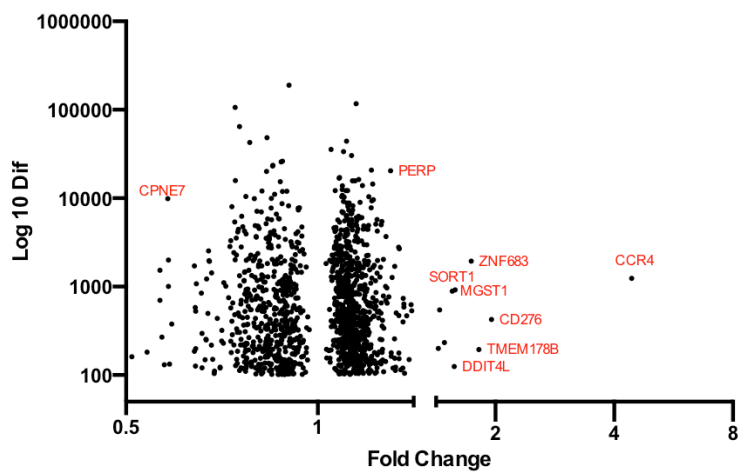

Supplement: bloodBLD2020006200-suppl1.pdf [file bloodBLD2020006200-suppl1.pdf]
